# Supplementary material for: Novel catalysts for dechlorination of polychlorinated biphenyls (PCBs) and other chlorinated aromatics
Source: Royal Society of Chemistry journal article supplement (doi:10.1039/b705756c), 2007-01-01
Supplement: b705756c.pdf [file b705756c.pdf]

## Novel catalysts for dechlorination of polychlorinated biphenyls (PCBs) and other chlorinated aromatics

Andrew E.D. Fletcher, James Moss, Andrew R. Cowley and Dermot O'Hare\*

### ELECTRONIC SUPPLEMENTARY DATA

Table 1: Crystal data and refinement details for 2[BF<sub>4</sub>]<sub>2</sub>

|                                                            |                                                                               |
|------------------------------------------------------------|-------------------------------------------------------------------------------|
| Crystal identification                                     | ARC1514                                                                       |
| Chemical formula                                           | C <sub>32</sub> H <sub>38</sub> B <sub>2</sub> F <sub>8</sub> Fe <sub>2</sub> |
| Formula weight                                             | 707.95                                                                        |
| Temperature (K)                                            | 150                                                                           |
| Wavelength (Å)                                             | 0.71073                                                                       |
| Crystal system                                             | Monoclinic                                                                    |
| Space group                                                | <i>P</i> 2 <sub>1</sub> / <i>n</i>                                            |
| <i>a</i> (Å)                                               | 9.5417(3)                                                                     |
| <i>b</i> (Å)                                               | 26.6042(10)                                                                   |
| <i>c</i> (Å)                                               | 12.3888(4)                                                                    |
| $\alpha$ (°)                                               | 90                                                                            |
| $\beta$ (°)                                                | 107.7721(7)                                                                   |
| $\gamma$ (°)                                               | 90                                                                            |
| Cell volume (Å <sup>3</sup> )                              | 2994.81(18)                                                                   |
| Z                                                          | 4                                                                             |
| Calculated density (Mg/m <sup>3</sup> )                    | 1.570                                                                         |
| Absorption coefficient (mm <sup>-1</sup> )                 | 1.041                                                                         |
| F <sub>000</sub>                                           | 1456                                                                          |
| Crystal size (mm)                                          | 0.06 x 0.08 x 0.26                                                            |
| Description of crystal                                     | Orange prism                                                                  |
| Absorption correction                                      | Semi-empirical from equivalent reflections                                    |
| Transmission coefficients (min,max)                        | 0.76, 0.94                                                                    |
| $\theta$ range for data collection (°)                     | 5.0 ≤ $\theta$ ≤ 27.5                                                         |
| Index ranges                                               | -12 ≤ <i>h</i> ≤ 11, 0 ≤ <i>k</i> ≤ 34, 0 ≤ <i>l</i> ≤ 15                     |
| Reflections measured                                       | 23181                                                                         |
| Unique reflections                                         | 6378                                                                          |
| R <sub>int</sub>                                           | 0.063                                                                         |
| Observed reflections ( <i>I</i> > 3 $\sigma$ ( <i>I</i> )) | 3965                                                                          |
| Refinement method                                          | Full-matrix least-squares on <i>F</i>                                         |
| Parameters refined                                         | 477                                                                           |
| Weighting scheme                                           | Chebyshev 3-term polynomial                                                   |

\*Chemistry Research Laboratory, Department of Chemistry, University of Oxford, Mansfield Road, Oxford, OX1 3TA, United Kingdom. Fax: 44 1865 285131; Tel: 44 1865 285130; E-mail: [dermot.ohare@chem.ox.ac.uk](mailto:dermot.ohare@chem.ox.ac.uk)

|                                                         |             |
|---------------------------------------------------------|-------------|
| Goodness of fit                                         | 1.0102      |
| R                                                       | 0.0785      |
| wR                                                      | 0.0713      |
| Residual electron density (min,max) (eÅ <sup>-3</sup> ) | -0.86, 1.13 |

**Table 2: Bond lengths (Å) for 2[BF<sub>4</sub>]<sub>2</sub>**

|               |          |               |           |
|---------------|----------|---------------|-----------|
| Fe(1) - C(2)  | 2.111(5) | C(3) - C(15)  | 1.516(8)  |
| Fe(1) - C(3)  | 2.152(5) | C(4) - C(5)   | 1.443(8)  |
| Fe(1) - C(4)  | 2.085(5) | C(4) - C(16)  | 1.514(7)  |
| Fe(1) - C(5)  | 2.086(5) | C(5) - C(6)   | 1.410(7)  |
| Fe(1) - C(6)  | 2.167(5) | C(5) - C(17)  | 1.522(8)  |
| Fe(1) - C(7)  | 2.086(5) | C(6) - C(7)   | 1.419(7)  |
| Fe(1) - C(23) | 2.064(5) | C(6) - C(18)  | 1.515(8)  |
| Fe(1) - C(24) | 2.067(5) | C(7) - C(8)   | 1.516(7)  |
| Fe(1) - C(25) | 2.049(5) | C(8) - C(9)   | 1.419(7)  |
| Fe(1) - C(26) | 2.048(5) | C(8) - C(13)  | 1.424(7)  |
| Fe(1) - C(27) | 2.056(5) | C(9) - C(10)  | 1.430(7)  |
| Fe(2) - C(8)  | 2.064(5) | C(9) - C(19)  | 1.518(8)  |
| Fe(2) - C(9)  | 2.176(5) | C(10) - C(11) | 1.437(9)  |
| Fe(2) - C(10) | 2.109(5) | C(10) - C(20) | 1.502(8)  |
| Fe(2) - C(11) | 2.096(5) | C(11) - C(12) | 1.411(8)  |
| Fe(2) - C(12) | 2.120(5) | C(11) - C(21) | 1.525(8)  |
| Fe(2) - C(13) | 2.109(5) | C(12) - C(13) | 1.398(7)  |
| Fe(2) - C(28) | 2.053(6) | C(12) - C(22) | 1.536(8)  |
| Fe(2) - C(29) | 2.058(6) | C(23) - C(24) | 1.428(8)  |
| Fe(2) - C(30) | 2.045(6) | C(23) - C(27) | 1.406(8)  |
| Fe(2) - C(31) | 2.045(6) | C(24) - C(25) | 1.419(9)  |
| Fe(2) - C(32) | 2.055(6) | C(25) - C(26) | 1.413(8)  |
| C(1) - C(2)   | 1.509(7) | C(26) - C(27) | 1.418(8)  |
| C(1) - C(13)  | 1.511(7) | C(28) - C(29) | 1.383(9)  |
| C(1) - C(14)  | 1.558(7) | C(28) - C(32) | 1.413(10) |
| C(2) - C(3)   | 1.410(7) | C(29) - C(30) | 1.396(10) |
| C(2) - C(7)   | 1.430(8) | C(30) - C(31) | 1.402(10) |
| C(3) - C(4)   | 1.413(8) | C(31) - C(32) | 1.419(10) |
|               |          |               |           |
| B(1) - F(1)   | 1.382(8) | B(1) - F(3)   | 1.369(9)  |
| B(1) - F(2)   | 1.385(8) | B(1) - F(4)   | 1.375(8)  |
|               |          |               |           |
|               |          |               |           |
| B(2) - F(5)   | 1.41(1)  | B(2) - F(7)   | 1.376(8)  |
| B(2) - F(6)   | 1.363(9) | B(2) - F(8)   | 1.355(8)  |

Note – H atoms have been excluded

**Table 3: Bond angles (°) for 2[BF<sub>4</sub>]<sub>2</sub>**

|                       |           |                       |          |
|-----------------------|-----------|-----------------------|----------|
| C(2) - Fe(1) - C(3)   | 38.60(19) | C(30) - Fe(2) - C(32) | 67.5(2)  |
| C(2) - Fe(1) - C(4)   | 70.8(2)   | C(31) - Fe(2) - C(32) | 40.5(3)  |
| C(3) - Fe(1) - C(4)   | 38.9(2)   | C(2) - C(1) - C(13)   | 102.1(4) |
| C(2) - Fe(1) - C(5)   | 84.04(19) | C(2) - C(1) - C(14)   | 114.7(4) |
| C(3) - Fe(1) - C(5)   | 71.2(2)   | C(13) - C(1) - C(14)  | 110.4(4) |
| C(4) - Fe(1) - C(5)   | 40.5(2)   | Fe(1) - C(2) - C(1)   | 135.3(3) |
| C(2) - Fe(1) - C(6)   | 70.53(19) | Fe(1) - C(2) - C(3)   | 72.3(3)  |
| C(3) - Fe(1) - C(6)   | 83.43(18) | C(1) - C(2) - C(3)    | 127.0(5) |
| C(4) - Fe(1) - C(6)   | 71.6(2)   | Fe(1) - C(2) - C(7)   | 69.1(3)  |
| C(5) - Fe(1) - C(6)   | 38.7(2)   | C(1) - C(2) - C(7)    | 111.8(4) |
| C(2) - Fe(1) - C(7)   | 39.8(2)   | C(3) - C(2) - C(7)    | 121.1(5) |
| C(3) - Fe(1) - C(7)   | 71.4(2)   | Fe(1) - C(3) - C(2)   | 69.1(3)  |
| C(4) - Fe(1) - C(7)   | 85.61(19) | Fe(1) - C(3) - C(4)   | 68.0(3)  |
| C(5) - Fe(1) - C(7)   | 71.12(19) | C(2) - C(3) - C(4)    | 119.0(5) |
| C(6) - Fe(1) - C(7)   | 38.9(2)   | Fe(1) - C(3) - C(15)  | 135.5(4) |
| C(2) - Fe(1) - C(23)  | 175.9(2)  | C(2) - C(3) - C(15)   | 120.6(5) |
| C(3) - Fe(1) - C(23)  | 143.3(2)  | C(4) - C(3) - C(15)   | 120.4(5) |
| C(4) - Fe(1) - C(23)  | 112.6(2)  | Fe(1) - C(4) - C(3)   | 73.1(3)  |
| C(5) - Fe(1) - C(23)  | 100.0(2)  | Fe(1) - C(4) - C(5)   | 69.8(3)  |
| C(6) - Fe(1) - C(23)  | 112.4(2)  | C(3) - C(4) - C(5)    | 119.5(5) |
| C(2) - Fe(1) - C(24)  | 136.8(2)  | Fe(1) - C(4) - C(16)  | 130.5(4) |
| C(3) - Fe(1) - C(24)  | 169.8(2)  | C(3) - C(4) - C(16)   | 119.9(5) |
| C(4) - Fe(1) - C(24)  | 150.2(2)  | C(5) - C(4) - C(16)   | 120.7(5) |
| C(5) - Fe(1) - C(24)  | 119.0(2)  | Fe(1) - C(5) - C(4)   | 69.7(3)  |
| C(6) - Fe(1) - C(24)  | 103.8(2)  | Fe(1) - C(5) - C(6)   | 73.8(3)  |
| C(2) - Fe(1) - C(25)  | 108.5(2)  | C(4) - C(5) - C(6)    | 121.4(5) |
| C(3) - Fe(1) - C(25)  | 129.4(2)  | Fe(1) - C(5) - C(17)  | 129.5(4) |
| C(4) - Fe(1) - C(25)  | 159.8(2)  | C(4) - C(5) - C(17)   | 119.1(5) |
| C(5) - Fe(1) - C(25)  | 158.4(2)  | C(6) - C(5) - C(17)   | 119.5(5) |
| C(6) - Fe(1) - C(25)  | 127.9(2)  | Fe(1) - C(6) - C(5)   | 67.5(3)  |
| C(2) - Fe(1) - C(26)  | 109.0(2)  | Fe(1) - C(6) - C(7)   | 67.5(3)  |
| C(3) - Fe(1) - C(26)  | 103.7(2)  | C(5) - C(6) - C(7)    | 118.0(5) |
| C(4) - Fe(1) - C(26)  | 119.9(2)  | Fe(1) - C(6) - C(18)  | 140.5(4) |
| C(5) - Fe(1) - C(26)  | 152.6(2)  | C(5) - C(6) - C(18)   | 118.6(5) |
| C(6) - Fe(1) - C(26)  | 168.1(2)  | C(7) - C(6) - C(18)   | 123.3(5) |
| C(2) - Fe(1) - C(27)  | 138.6(2)  | Fe(1) - C(7) - C(2)   | 71.0(3)  |
| C(3) - Fe(1) - C(27)  | 110.1(2)  | Fe(1) - C(7) - C(6)   | 73.6(3)  |
| C(4) - Fe(1) - C(27)  | 99.0(2)   | C(2) - C(7) - C(6)    | 120.2(4) |
| C(5) - Fe(1) - C(27)  | 114.7(2)  | Fe(1) - C(7) - C(8)   | 130.1(3) |
| C(6) - Fe(1) - C(27)  | 146.1(2)  | C(2) - C(7) - C(8)    | 106.5(4) |
| C(7) - Fe(1) - C(23)  | 141.1(2)  | C(6) - C(7) - C(8)    | 133.1(5) |
| C(7) - Fe(1) - C(24)  | 109.6(2)  | Fe(2) - C(8) - C(7)   | 121.1(3) |
| C(23) - Fe(1) - C(24) | 40.4(2)   | Fe(2) - C(8) - C(9)   | 74.7(3)  |
| C(7) - Fe(1) - C(25)  | 106.9(2)  | C(7) - C(8) - C(9)    | 133.6(5) |
| C(23) - Fe(1) - C(25) | 67.5(2)   | Fe(2) - C(8) - C(13)  | 71.8(3)  |
| C(24) - Fe(1) - C(25) | 40.3(2)   | C(7) - C(8) - C(13)   | 106.9(4) |
| C(7) - Fe(1) - C(26)  | 134.0(2)  | C(9) - C(8) - C(13)   | 119.5(5) |
| C(23) - Fe(1) - C(26) | 67.5(2)   | Fe(2) - C(9) - C(8)   | 66.3(3)  |
| C(24) - Fe(1) - C(26) | 68.0(2)   | Fe(2) - C(9) - C(10)  | 68.0(3)  |
| C(25) - Fe(1) - C(26) | 40.4(2)   | C(8) - C(9) - C(10)   | 118.1(5) |
| C(7) - Fe(1) - C(27)  | 174.2(2)  | Fe(2) - C(9) - C(19)  | 144.0(4) |
| C(23) - Fe(1) - C(27) | 39.9(2)   | C(8) - C(9) - C(19)   | 123.8(5) |
| C(24) - Fe(1) - C(27) | 67.9(2)   | C(10) - C(9) - C(19)  | 117.8(5) |

|                       |           |                       |          |
|-----------------------|-----------|-----------------------|----------|
| C(25) - Fe(1) - C(27) | 67.7(2)   | Fe(2) - C(10) - C(9)  | 73.0(3)  |
| C(26) - Fe(1) - C(27) | 40.4(2)   | Fe(2) - C(10) - C(11) | 69.5(3)  |
| C(8) - Fe(2) - C(9)   | 39.0(2)   | C(9) - C(10) - C(11)  | 120.5(5) |
| C(8) - Fe(2) - C(10)  | 71.68(19) | Fe(2) - C(10) - C(20) | 129.6(4) |
| C(9) - Fe(2) - C(10)  | 39.0(2)   | C(9) - C(10) - C(20)  | 118.8(5) |
| C(8) - Fe(2) - C(11)  | 85.90(19) | C(11) - C(10) - C(20) | 120.7(5) |
| C(9) - Fe(2) - C(11)  | 71.3(2)   | Fe(2) - C(11) - C(10) | 70.5(3)  |
| C(10) - Fe(2) - C(11) | 40.0(2)   | Fe(2) - C(11) - C(12) | 71.4(3)  |
| C(8) - Fe(2) - C(12)  | 72.2(2)   | C(10) - C(11) - C(12) | 119.9(5) |
| C(9) - Fe(2) - C(12)  | 83.7(2)   | Fe(2) - C(11) - C(21) | 131.9(4) |
| C(10) - Fe(2) - C(12) | 71.3(2)   | C(10) - C(11) - C(21) | 119.8(5) |
| C(11) - Fe(2) - C(12) | 39.1(2)   | C(12) - C(11) - C(21) | 120.3(5) |
| C(8) - Fe(2) - C(13)  | 39.9(2)   | Fe(2) - C(12) - C(11) | 69.5(3)  |
| C(9) - Fe(2) - C(13)  | 69.92(19) | Fe(2) - C(12) - C(13) | 70.3(3)  |
| C(10) - Fe(2) - C(13) | 83.5(2)   | C(11) - C(12) - C(13) | 119.1(5) |
| C(11) - Fe(2) - C(13) | 70.3(2)   | Fe(2) - C(12) - C(22) | 130.8(4) |
| C(12) - Fe(2) - C(13) | 38.6(2)   | C(11) - C(12) - C(22) | 121.2(5) |
| C(8) - Fe(2) - C(28)  | 139.3(3)  | C(13) - C(12) - C(22) | 119.7(5) |
| C(9) - Fe(2) - C(28)  | 113.6(2)  | Fe(2) - C(13) - C(1)  | 134.6(3) |
| C(10) - Fe(2) - C(28) | 103.4(2)  | Fe(2) - C(13) - C(8)  | 68.4(3)  |
| C(11) - Fe(2) - C(28) | 116.8(2)  | C(1) - C(13) - C(8)   | 111.2(4) |
| C(12) - Fe(2) - C(28) | 146.3(3)  | Fe(2) - C(13) - C(12) | 71.1(3)  |
| C(8) - Fe(2) - C(29)  | 108.6(2)  | C(1) - C(13) - C(12)  | 127.0(5) |
| C(9) - Fe(2) - C(29)  | 106.3(2)  | C(8) - C(13) - C(12)  | 121.7(5) |
| C(10) - Fe(2) - C(29) | 123.3(3)  | Fe(1) - C(23) - C(24) | 69.9(3)  |
| C(11) - Fe(2) - C(29) | 154.2(3)  | Fe(1) - C(23) - C(27) | 69.7(3)  |
| C(12) - Fe(2) - C(29) | 165.1(3)  | C(24) - C(23) - C(27) | 108.6(5) |
| C(8) - Fe(2) - C(30)  | 105.4(2)  | Fe(1) - C(24) - C(23) | 69.7(3)  |
| C(9) - Fe(2) - C(30)  | 129.3(2)  | Fe(1) - C(24) - C(25) | 69.1(3)  |
| C(10) - Fe(2) - C(30) | 162.1(3)  | C(23) - C(24) - C(25) | 106.8(5) |
| C(11) - Fe(2) - C(30) | 157.6(3)  | Fe(1) - C(25) - C(24) | 70.5(3)  |
| C(12) - Fe(2) - C(30) | 125.4(3)  | Fe(1) - C(25) - C(26) | 69.8(3)  |
| C(8) - Fe(2) - C(31)  | 132.9(2)  | C(24) - C(25) - C(26) | 108.7(5) |
| C(9) - Fe(2) - C(31)  | 168.9(2)  | Fe(1) - C(26) - C(25) | 69.8(3)  |
| C(10) - Fe(2) - C(31) | 152.0(2)  | Fe(1) - C(26) - C(27) | 70.1(3)  |
| C(11) - Fe(2) - C(31) | 118.6(3)  | C(25) - C(26) - C(27) | 107.8(5) |
| C(12) - Fe(2) - C(31) | 101.1(2)  | Fe(1) - C(27) - C(23) | 70.4(3)  |
| C(8) - Fe(2) - C(32)  | 172.7(2)  | Fe(1) - C(27) - C(26) | 69.5(3)  |
| C(9) - Fe(2) - C(32)  | 146.7(3)  | C(23) - C(27) - C(26) | 108.0(5) |
| C(10) - Fe(2) - C(32) | 115.5(2)  | Fe(2) - C(28) - C(29) | 70.5(4)  |
| C(11) - Fe(2) - C(32) | 100.4(2)  | Fe(2) - C(28) - C(32) | 69.9(3)  |
| C(12) - Fe(2) - C(32) | 110.5(3)  | C(29) - C(28) - C(32) | 108.5(6) |
| C(13) - Fe(2) - C(28) | 172.5(2)  | Fe(2) - C(29) - C(28) | 70.2(4)  |
| C(13) - Fe(2) - C(29) | 134.1(2)  | Fe(2) - C(29) - C(30) | 69.6(4)  |
| C(28) - Fe(2) - C(29) | 39.3(3)   | C(28) - C(29) - C(30) | 108.5(6) |
| C(13) - Fe(2) - C(30) | 105.8(2)  | Fe(2) - C(30) - C(29) | 70.6(3)  |
| C(28) - Fe(2) - C(30) | 66.8(3)   | Fe(2) - C(30) - C(31) | 70.0(3)  |
| C(29) - Fe(2) - C(30) | 39.8(3)   | C(29) - C(30) - C(31) | 108.3(5) |
| C(13) - Fe(2) - C(31) | 107.7(2)  | Fe(2) - C(31) - C(30) | 69.9(3)  |
| C(28) - Fe(2) - C(31) | 67.5(3)   | Fe(2) - C(31) - C(32) | 70.1(3)  |
| C(29) - Fe(2) - C(31) | 67.1(3)   | C(30) - C(31) - C(32) | 107.6(6) |
| C(30) - Fe(2) - C(31) | 40.1(3)   | Fe(2) - C(32) - C(28) | 69.8(3)  |
| C(13) - Fe(2) - C(32) | 139.1(3)  | Fe(2) - C(32) - C(31) | 69.4(3)  |

|                       |          |                       |          |
|-----------------------|----------|-----------------------|----------|
| C(28) - Fe(2) - C(32) | 40.2(3)  | C(28) - C(32) - C(31) | 107.0(6) |
| C(29) - Fe(2) - C(32) | 67.0(3)  |                       |          |
|                       |          |                       |          |
| F(1) - B(1) - F(2)    | 109.2(5) | F(1) - B(1) - F(4)    | 109.5(6) |
| F(1) - B(1) - F(3)    | 109.5(5) | F(2) - B(1) - F(4)    | 109.1(5) |
| F(2) - B(1) - F(3)    | 109.8(6) | F(3) - B(1) - F(4)    | 109.7(6) |
|                       |          |                       |          |
| F(5) - B(2) - F(6)    | 108.5(7) | F(5) - B(2) - F(8)    | 110.3(6) |
| F(5) - B(2) - F(7)    | 107.4(5) | F(6) - B(2) - F(8)    | 110.5(6) |
| F(6) - B(2) - F(7)    | 108.5(6) | F(7) - B(2) - F(8)    | 111.4(7) |

Note – H atoms have been excluded

**Table 4: Yields of biphenyl from dechlorination of PCBs with pyridine base**

| Catalyst/conditions                      |       | Time (hours) | Yield (%) |
|------------------------------------------|-------|--------------|-----------|
| <b>1</b> [PF <sub>6</sub> ] <sub>2</sub> | Light | 4            | 29.7      |
|                                          |       | 24           | 35.0      |
|                                          | Dark  | 4            | 35.6      |
|                                          |       | 24           | 39.1      |
| <b>2</b> [PF <sub>6</sub> ] <sub>2</sub> | Light | 4            | 30.5      |
|                                          |       | 24           | 45.6      |
|                                          | Dark  | 4            | 31.3      |
|                                          |       | 24           | 49.8      |
| Cp <sub>2</sub> TiCl <sub>2</sub>        | Light | 4            | 19.9      |
|                                          |       | 24           | 55.7      |

**Table 5: Percentage conversion from dechlorination of 1,2,4,5-tetrachlorobenzene at various times with pyridine base, tests run in darkness**

| Catalyst                                 | Time (hours) | Iso mers present at given reaction time expressed as a % of detected material       |                                                                                     |                                                                                     |                                                                                     |                                                                                      |                                                                                       |                                                                                       |
|------------------------------------------|--------------|-------------------------------------------------------------------------------------|-------------------------------------------------------------------------------------|-------------------------------------------------------------------------------------|-------------------------------------------------------------------------------------|--------------------------------------------------------------------------------------|---------------------------------------------------------------------------------------|---------------------------------------------------------------------------------------|
|                                          |              | 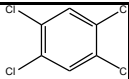 |  |  |  |  |  |  |
| <b>1</b> [PF <sub>6</sub> ] <sub>2</sub> | 1            | 100                                                                                 | -                                                                                   | -                                                                                   | -                                                                                   | -                                                                                    | -                                                                                     | -                                                                                     |
|                                          | 2            | 100                                                                                 | -                                                                                   | -                                                                                   | -                                                                                   | -                                                                                    | -                                                                                     | -                                                                                     |
|                                          | 4            | 100                                                                                 | -                                                                                   | -                                                                                   | -                                                                                   | -                                                                                    | -                                                                                     | -                                                                                     |
|                                          | 24           | 100                                                                                 | -                                                                                   | -                                                                                   | -                                                                                   | -                                                                                    | -                                                                                     | -                                                                                     |
| <b>2</b> [PF <sub>6</sub> ] <sub>2</sub> | 1            | 100                                                                                 | -                                                                                   | -                                                                                   | -                                                                                   | -                                                                                    | -                                                                                     | -                                                                                     |
|                                          | 2            | -                                                                                   | 64.8                                                                                | 16.0                                                                                | -                                                                                   | 18.9                                                                                 | -                                                                                     | -                                                                                     |
|                                          | 4            | -                                                                                   | -                                                                                   | 19.5                                                                                | -                                                                                   | 22.0                                                                                 | 58.5                                                                                  | -                                                                                     |
|                                          | 24           | -                                                                                   | -                                                                                   | -                                                                                   | -                                                                                   | -                                                                                    | 84.7                                                                                  | 14.1                                                                                  |
